# Supplementary material for: AuthorReward: increasing community curation in biological knowledge wikis through automated authorship quantification
Source: PubMed Central journal article supplement — Bioinformatics. 2013 Jun 3;29(14):1837–9. doi: 10.1093/bioinformatics/btt284 (PMC3702255; doi:10.1093/bioinformatics/btt284), 2013-06-03
Supplement: supp_btt284_FigureS1.pdf [file supp_btt284_FigureS1.pdf]

(A)

Page Discussion Read View source View history Go Search

## Os01g0883800

Please cite: Lina Ma, Zhang Zhang, Gang Wu (2012) Gene: "Os01g0883800" in *RiceWiki*, available at <http://ricewiki.big.ac.cn/index.php?title=Os01g0883800&oldid=166658> (Last update: Aug 23, 2012). [See details]

The rice *semidwarf-1* (*sd1*) is well known as the "green revolution gene" and controls the plant height of rice.

**Contents** [hide]

- Annotated Information
  - Function
  - Mutation
  - Expression
  - Evolution
  - Knowledge Extension
- Labs working on this gene
- References
- Structured Information

### Annotated Information

#### Function

This gene is originally derived from the Chinese cultivar Dee-Geo-Woo-Gen (DGWG). It encodes an oxidase enzyme involved in the biosynthesis of gibberellin, which is a plant growth hormone. The rice genome carries at least two GA20ox genes (GA20ox-1 and GA20ox-2). SD1 corresponds to GA20ox-2. Mutation of SD1 will cause a semi-dwarf phenotype of rice without seed yield being affected<sup>[2]</sup>. It is not surprising that a rice semidwarfing gene encodes GA20-ox since successful production of semidwarf plants using antisense or overexpressed GA20-ox genes has been reported in Arabidopsis, Solanum dulcamara, potato, and lettuce<sup>[1]</sup>.

It is a key enzyme in the biosynthesis of gibberellin that catalyses the three steps GA53->GA44->GA19->GA20. Impaired GA 20-oxidase activity will cause elevated content of GA53, and reduced amount of G20<sup>[2][3]</sup>. However, there is slight difference between different strains. The extent of GA1 is lower in Doongara (semi-dwarf rice strain) when compared with Kyeema (tall), while there is no significant difference between Calrose76 (semi-dwarf rice strain) and Calrose (tall). Calrose76 has lower contents of GA44 and of GA19 than Calrose, while there is no significant difference between Doongara (semi-dwarf rice strain) and Kyeema (tall)<sup>[3]</sup>.

**GO assignment(s):** GO:0005506, GO:0016216, GO:0017000

Semidwarf VS. normal-type rice plants at ripening (from reference<sup>[1]</sup>).

(B)

**Figure S1** Screenshots of the *sd1* gene, available at <http://ricewiki.big.ac.cn/index.php/Os01g0883800>. (A) Community-curated information, including the resulting authorship and curated information. (B) Reward details, including contributor name, contribution score, edit count, etc. The cut-off score for awarding authorship is configurable and set to 1 by default.

Please cite: Lina Ma, Zhang Zhang, Gang Wu (2012) Gene: "Os01g0883800" in *RiceWiki*, available at <http://ricewiki.big.ac.cn/index.php?title=Os01g0883800&oldid=166658> (Last update: Aug 23, 2012).

**Contribution Visualization**

| Contributor | Contribution Score | Edit Count <sup>†</sup> | Summed Edit Quantity <sup>^</sup> | Averaged Edit Quality <sup>‡</sup> | Latest Edit Time    | Edit Details |
|-------------|--------------------|-------------------------|-----------------------------------|------------------------------------|---------------------|--------------|
| Lina Ma     | 5.057              | 5                       | 6264                              | 0.807                              | 2012-07-24 22:52:27 | [show]       |
| Zhang Zhang | 1.421              | 3                       | 1506                              | 0.944                              | 2012-08-23 21:30:02 | [show]       |
| Gang Wu     | 1.31               | 1                       | 1406                              | 0.932                              | 2012-07-24 01:47:48 | [show]       |

Contributors with score < 1 are excluded from the authorship. [Expand]

<sup>^</sup>Multiple successive edits performed by a researcher are counted as one edit.  
<sup>^</sup>Edit quantity is the sum over all participated edits.  
<sup>‡</sup>Edit quality is normalized over all participated edits.  
 Please note that contribution quantification may take time to reflect recent edits.
